# Supplementary material
Source: Springer Nature journal article supplement (https://www.springermedizin.de/resource/supplementary/12881_2008_444_MOESM2_ESM.pdf/9450668)

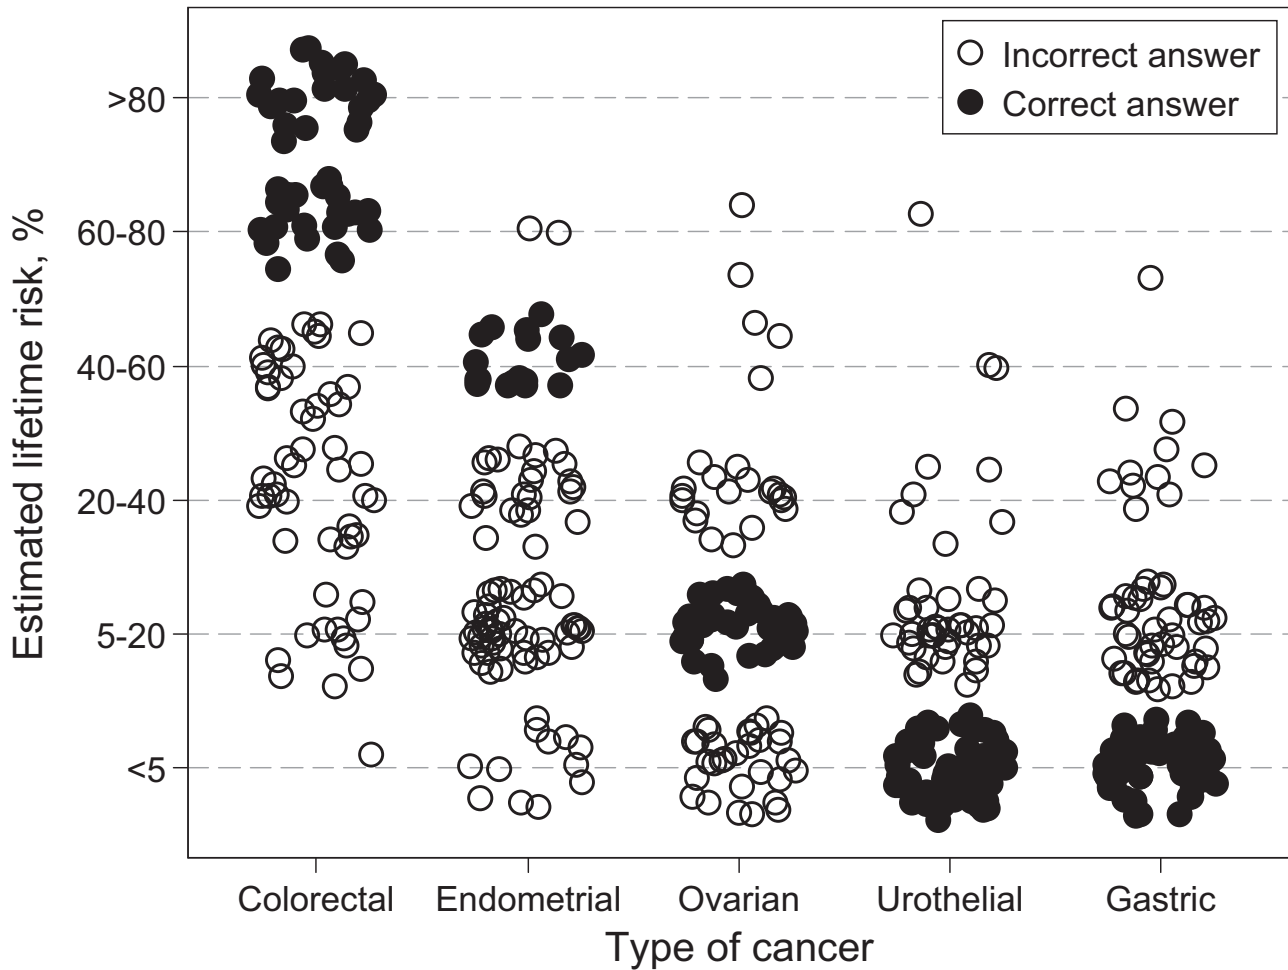

Supplement: MOESM2 [file 9450668]
